# Supplementary material
Source: PubMed Central journal article supplement (PMC3013541)
Supplement: ASN.2009111186_1.pdf [file ASN.2009111186_1.pdf]

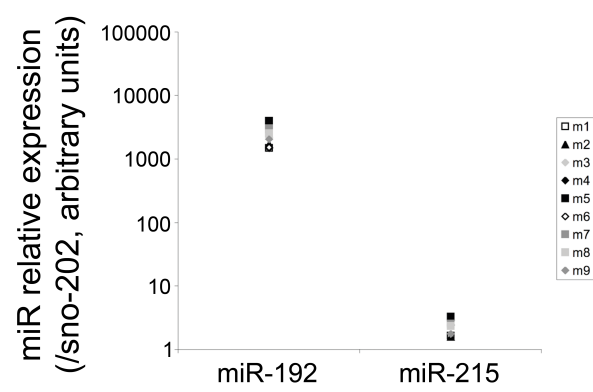

**Supplemental Figure S1**

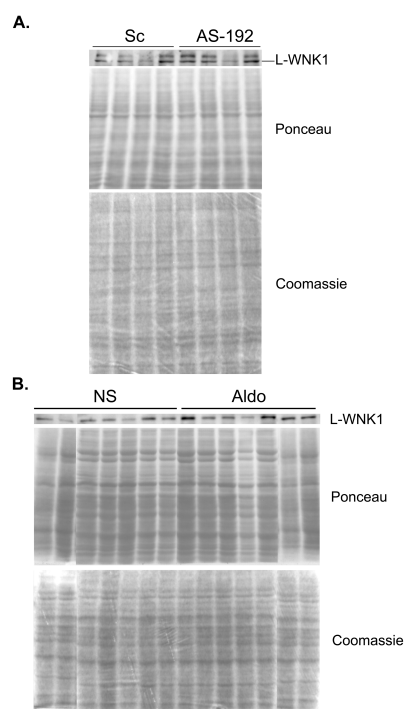

**Supplemental Figure S2**

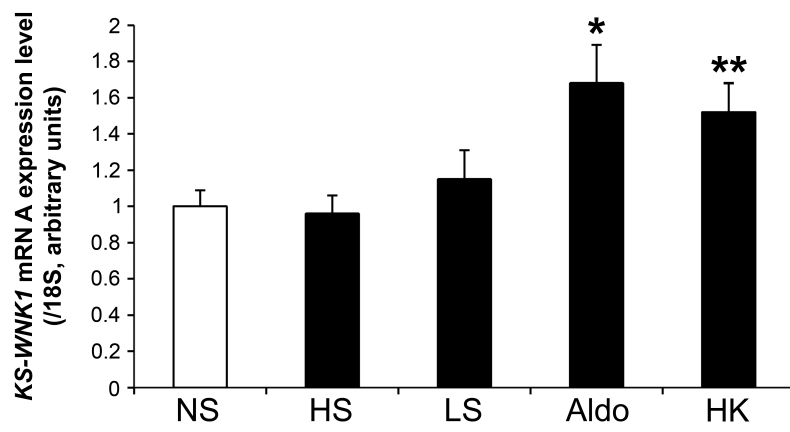

Supplemental Figure S3

| miRanda<br>miRBase     | miRanda<br>microrna.org | TargetScan            | DianamicroT            |
|------------------------|-------------------------|-----------------------|------------------------|
| <b>hsa-miR-22</b>      | hsa-miR-335             | hsa-miR-31            | <b>hsa-miR-27a</b>     |
| hsa-miR-138-1*         | hsa-miR-1276            | hsa-miR-103           | <b>hsa-miR-27b</b>     |
| <b>hsa-miR-215</b>     | hsa-miR-770-5p          | hsa-miR-107           | <b>hsa-miR-520d-5p</b> |
| hsa-miR-17*            | hsa-miR-1825            | <b>hsa-miR-192</b>    | <b>hsa-miR-524-5p</b>  |
| <b>hsa-miR-606</b>     | <b>hsa-miR-324-5p</b>   | <b>hsa-miR-215</b>    | hsa-miR-128a           |
| <b>hsa-miR-520d-5p</b> | <b>hsa-miR-192</b>      | <b>hsa-miR-155</b>    | hsa-miR-128b           |
| <b>hsa-miR-524-5p</b>  | <b>hsa-miR-215</b>      | <b>hsa-miR-128</b>    | hsa-miR-181a           |
| hsa-miR-384            | hsa-miR-511             | <b>hsa-miR-27a</b>    | hsa-miR-181b           |
| <b>hsa-miR-192</b>     | hsa-miR-889             | <b>hsa-miR-27b</b>    | hsa-miR-181c           |
| <b>hsa-miR-324-5p</b>  | <b>hsa-miR-320a</b>     | hsa-miR-17-5p         | hsa-miR-181d           |
| hsa-miR-660            | <b>hsa-miR-320b</b>     | hsa-miR-20            | hsa-miR-876-3p         |
|                        | <b>hsa-miR-320c</b>     | hsa-miR-93            | hsa-miR-561            |
|                        | <b>hsa-miR-320d</b>     | hsa-miR-106           | <b>hsa-miR-543</b>     |
|                        | hsa-miR-512-3p          | hsa-miR-519-d         | <b>hsa-miR-606</b>     |
|                        | <b>hsa-miR-155</b>      | hsa-miR-136           | <b>hsa-miR-215</b>     |
|                        | hsa-miR-302f            | <b>hsa-miR-543</b>    | <b>hsa-miR-22</b>      |
|                        | hsa-miR-1205            | <b>hsa-miR-320a</b>   |                        |
|                        | hsa-miR-548o            | <b>hsa-miR-320b</b>   |                        |
|                        | hsa-miR-548a-3p         | <b>hsa-miR-320c</b>   |                        |
|                        | hsa-miR-548 e           | <b>hsa-miR-320d</b>   |                        |
|                        | hsa-miR-1323            | hsa-miR-590           |                        |
|                        | hsa-miR-548f            | <b>hsa-miR-590-3p</b> |                        |
|                        | hsa-miR-768-3p          |                       |                        |
|                        | hsa-miR-199b-5p         |                       |                        |
|                        | <b>hsa-miR-128</b>      |                       |                        |
|                        | <b>hsa-miR-27a</b>      |                       |                        |
|                        | <b>hsa-miR-27b</b>      |                       |                        |
|                        | <b>hsa-miR-590-3p</b>   |                       |                        |
|                        | hsa-miR-582-5p          |                       |                        |
|                        | <b>hsa-miR-606</b>      |                       |                        |
|                        | <b>hsa-miR-524-5p</b>   |                       |                        |
|                        | hsa-miR-1283            |                       |                        |
|                        | hsa-miR-300             |                       |                        |
|                        | hsa-miR-381             |                       |                        |
|                        | <b>hsa-miR-520d-5p</b>  |                       |                        |
|                        | hsa-miR-518a-5p         |                       |                        |
|                        | hsa-miR-527             |                       |                        |
|                        | hsa-miR-1270            |                       |                        |
|                        | hsa-miR-875-3p          |                       |                        |
|                        | hsa-miR-655             |                       |                        |

**Supplemental Table S1: Potential target sites for miRs in *WNK1* 3'UTR.** Potential target sites for miRs as determined by miRanda (miRBase and microrna.org), TargetScan and DianamicroT algorithms. miRs target sites presented by at least 2 algorithms are represented in dark.

|                        | Control     | HS             | LS          | Aldo                      | HK             |
|------------------------|-------------|----------------|-------------|---------------------------|----------------|
| <b>Plasma</b>          |             |                |             |                           |                |
| Aldosterone (ng/dl)    | 23.5 ± 8.0  | 12.5 ± 8.7*    | 29.1 ± 9.5  | 82.6 ± 24.2 <sup>\$</sup> | 42.1 ± 24.1*   |
| <b>Urine</b>           |             |                |             |                           |                |
| uNa/uCreat (mmol/mmol) | 35.5 ± 16.1 | 157.0 ± 73.7** | 18.9 ± 3.0* | 29.2 ± 9.5                | 49.2 ± 13.6    |
| uK/uCreat (mmol/mmol)  | 34.7 ± 16.5 | 38.2 ± 22.7    | 30.8 ± 12.7 | 53.6 ± 4.4                | 250.7 ± 153.6* |
| uCl/uCreat (mmol/mmol) | 64.0 ± 24.3 | 187.9 ± 97.7** | 32.9 ± 7.3* | 31.3 ± 7.0                | 236.1 ± 139.1* |

**Supplemental Table 2 - Plasma aldosterone concentration and urine electrolytes of mice submitted to the different challenges.**

Plasma aldosterone was measured by RIA using the Coat-a-Count Aldosterone In-vitro Diagnostic Test Kit (Siemens Healthcare). Urine electrolytes were determined using an Olympus AU400 analyser. \* p < 0.05 compared to control diet, \*\* p < 0.005 compared to control diet, <sup>\$</sup> p < 1x10<sup>-4</sup>. Results are presented as mean +/- SD.
